# Supplementary material
Source: HighWire-hosted journal article supplement (http://cmajopen.ca/highwire/filestream/81230/field_highwire_adjunct_files/2/2018-0074-original-submission.pdf)
Supplement: 2018-0074-original-submission.pdf [file 2018-0074-original-submission.pdf]

1  
2  
3  
4  
5 **Use of patient reported outcomes in regional cancer centres over time: a**  
6 **retrospective study**  
7

8 Lisa Barbera MD<sup>1,2,\*</sup>, Faith Lee MSc<sup>3</sup>, Rinku Sutradhar PhD<sup>2</sup>  
9

10  
11 <sup>1</sup> Tom Baker Cancer Centre, Department of Oncology, University of Calgary, Calgary  
12 Alberta, Canada  
13

14 <sup>2</sup> Institute of Clinical Evaluative Sciences, Toronto, Ontario, Canada  
15

16 <sup>3</sup> Department of Statistics and Actuarial Science, University of Waterloo  
17

18  
19 \*formerly at Odette Cancer Centre, Sunnybrook Health Sciences Centre, Department of  
20 Radiation Oncology, Toronto, Ontario, Canada  
21

22 **Running Head:** factors associated with ESAS uptake over time  
23

24 **Funding source:** This study was conducted with the support of the Canadian Cancer  
25 Society Research Institute.  
26

27  
28 **Disclosures:** LB is the former Provincial Lead for Patient Reported Outcomes at  
29 Cancer Care Ontario.  
30

31  
32 **Acknowledgements:** This study was supported by the Institute for Clinical Evaluative  
33 Sciences (ICES), which is funded by an annual grant from the Ontario Ministry of Health  
34 and Long-Term Care (MOHLTC). Parts of this material are based on data and  
35 information provided by Cancer Care Ontario (CCO). The opinions, results, view, and  
36 conclusions reported in this paper are those of the authors and do not necessarily  
37 reflect those of CCO. The opinions, results and conclusions reported in this paper are  
38 those of the authors and are independent from the funding sources. No endorsement by  
39 ICES, MOHLTC or CCO is intended or should be inferred.  
40  
41

42  
43 Corresponding Author:  
44

45 Lisa Barbera  
46 Tom Baker Cancer Centre  
47 1313 29 St NW  
48 Calgary, AB  
49 T2N 4N2  
50 [Lisa.barbera@albertahealthservices.ca](mailto:Lisa.barbera@albertahealthservices.ca)  
51  
52 Tel: 403-521-3077  
53  
54 Fax: 403-283-1651  
55  
56  
57  
58  
59  
60

1  
2  
3 Manuscript word count: 3245 / 2500  
4  
5

## 6 **Abstract (250/250)** 7

8  
9 Introduction: Since 2007 Cancer Care Ontario (CCO) has been collecting the  
10 Edmonton Symptom Assessment System (ESAS) as a patient reported outcome  
11 measure for use in routine care. The purpose of this project was to evaluate the factors  
12 associated with ESAS uptake among cancer patients seen at regional cancer centres  
13 between 2007 and 2015 and to examine if these associations have changed over time.  
14  
15

### 16 **Methods** 17

18  
19 This is a retrospective cohort study among ESAS-eligible cancer patients in Ontario. We  
20 used linked administrative sources of health care data. Our primary outcome for each  
21 individual was defined as the rate of ESAS assessments which was analyzed overall  
22 and on an annual basis.  
23  
24

### 25 **Results** 26

27 We identified 525, 409 unique patients with at least one visit to a cancer centre between  
28 2007 and 2015. The proportion of patients with at least one ESAS increased from 5% in  
29 2007 to 67% in 2015. Analysis demonstrated decreased variation by region and cancer  
30 type over time with relative rates (RR) ranging from 0.31 to 13.3 in 2007 versus 0.7 to  
31 1.56 in 2015 for region and 0.03 to 1.0 in 2007 versus 0.55 to 1.0 in 2015 for cancer  
32 type. In 2015 women and people living in poorer neighbourhoods had a lower ESAS  
33 uptake (RR 0.93 and 0.91 respectively).  
34  
35  
36

### 37 **Conclusions** 38

39 Ontario has implemented a patient reported outcome program across the province.  
40 Over time, uptake has improved and variation by cancer type and region has  
41 decreased. Variation persists with other characteristics which suggest opportunities to  
42 improve equity in the program.  
43  
44  
45  
46  
47  
48  
49  
50  
51  
52  
53  
54  
55  
56  
57  
58  
59  
60

## Background

Patient reported outcome measures are tools or instruments used to capture a patients' health status from their perspective[1-2]. These measures have been used for some time in research and clinical trials[3]. Increasingly, they are being incorporated into routine clinical care[4-5]. There is evidence that they improve symptom identification, symptom monitoring over time, communication and quality of life[6-9]. There is emerging evidence that their routine use may decrease emergency room visits and even improve survival[10-13].

In 2007, Cancer Care Ontario implemented a province wide program to screen for common cancer symptoms using the Edmonton Symptom Assessment System (ESAS). Other jurisdictions have also ventured into this space. For example, there is a large program of patient reported outcomes in the Netherlands for pediatrics [14]. The Dartmouth Hitchcock Medical Centre has an institution wide program as another [15]. In the United Kingdom the National Health Services routinely collects patient reported outcomes on orthopedic patients and is expanding to other patient populations [16]. Swedish National Quality Registers have also started to collect patient reported outcomes [17]. The program at Cancer Care Ontario however is one of the largest most comprehensive patient reported outcome programs in existence.

The purpose of this project was to evaluate the rate of ESAS use over time among cancer patients seen at regional cancer centres. We also examine the factors associated with ESAS use and if these associations have changed over time. Cancer Care Ontario has made significant effort in supporting the use of ESAS in clinics but the

1  
2  
3 change has been slow. This paper aims to provide a robust description of the changes  
4  
5 in ESAS use over time and by region and to evaluate how other patient, tumor and  
6  
7 system factors might be associated with ESAS uptake over time.  
8  
9

## 10 **Methods**

### 11 **Study design and setting**

12  
13  
14  
15  
16  
17 We conducted a retrospective cohort study among ESAS-eligible cancer patients  
18  
19 in Ontario, Canada. The study used administrative sources of health care data linked  
20  
21 via a unique encoded identifier. It is not possible to approach this question as a formal  
22  
23 implementation evaluation. The implementation of the ESAS program is an ongoing  
24  
25 effort at 14 cancer centres that cumulatively reflects a myriad of local efforts. It would  
26  
27 not be possible to catalogue these efforts over time or attribute changes in ESAS rates  
28  
29 to any one particular endeavour. ESAS implementation went live in all centres in 2007  
30  
31 for lung cancer patients and patients attending palliative care clinics. This was a central  
32  
33 strategy direction from CCO. Some centres were able to mobilize and act quickly but  
34  
35 others struggled. By 2010 most centres had expanded implementation to include all  
36  
37 cancer sites. How this expansion occurred was left to local sites. The ability to  
38  
39 document these changes precisely is beyond the scope of this project and efforts to do  
40  
41 so are unlikely to be successful given staff changes over the past decade.  
42  
43  
44  
45  
46  
47

48 In Ontario, radiation treatment and a large proportion of systemic therapy are  
49  
50 provided in regional cancer centres. Some systemic therapy is provided at partner  
51  
52 hospitals. Some cancer patients (especially those treated only with surgery) are never  
53  
54 seen at a cancer center. The provincial Patient Reported Outcomes program that  
55  
56  
57  
58  
59  
60

1  
2  
3 oversees implementation is active in all regional cancer centres. While it is also active  
4 at some partner hospitals, implementation is not consistent and they are not included in  
5 this study.  
6  
7  
8  
9

10  
11 Every five years Cancer Care Ontario publishes a provincial cancer plan which  
12 outlines strategic priorities for the organization. Although ESAS was introduced in 2007,  
13 in the most recent cancer plan, patient reported outcomes were specifically identified,  
14 reflecting the increasing importance of patient reported outcomes within the  
15 organization. In order to facilitate patient reported outcome implementation Cancer  
16 Care Ontario built and maintains a web-based platform to administer patient reported  
17 outcome measures in the clinic. All symptom reports are collected centrally in the  
18 Symptom Management Reporting Database. It also provides support to each center for  
19 ongoing implementation, sustainability and quality improvement work via service  
20 agreements. In spite of the central mandate, each center has implemented in ways that  
21 suit local context. Over time cancer centres have been monitored for their performance  
22 on how many patients are screened each month.  
23  
24  
25  
26  
27  
28  
29  
30  
31  
32  
33  
34  
35  
36  
37  
38

39 ESAS is a 9 item instrument that asks patients to rate the intensity of their  
40 symptoms on a scale of 0-10[18]. The 9 symptoms included are anxiety, depression,  
41 fatigue, drowsiness, pain, shortness of breath, nausea, appetite and wellbeing. It was  
42 originally developed in palliative cancer patients but has since been validated in general  
43 oncology patients [19]. Implementation started in a limited group of patients, but by  
44 2010 had been rolled out more broadly [20-22]. At the present time, every cancer  
45 patient attending a regional cancer centre is encouraged to complete ESAS at a kiosk in  
46  
47  
48  
49  
50  
51  
52  
53  
54  
55  
56  
57  
58  
59  
60

1  
2  
3 the waiting room before being seen by their medical team. The output is intended to be  
4  
5 used in the clinical encounter and to facilitate a discussion about symptoms and care.  
6  
7

#### 8 9 Study population and observation window

10  
11 ESAS-eligible cancer patients are adults (>18 years) who visited any of the  
12 regional cancer centers in Ontario between 1<sup>st</sup> April 2007 and 31<sup>st</sup> December 2015.  
13  
14 Such individuals were identified by the presence of records in the Activity Level  
15 Reporting database. Visits to any of the regional cancer center programs were eligible  
16 (e.g. radiation program, systemic program) except Preventive Oncology or Research, as  
17 ESAS may not occur at those visits types. Exclusion criteria for our cohort were defined  
18 as having one or more of the following: invalid unique encoded identifier, missing date  
19 of birth, non-first cancer diagnosis, or death date before cohort entry. Individuals with  
20 invalid visit program codes in the Activity Level Reporting database were also excluded.  
21 Subsequently, if individuals in our cohort had missing information on the covariates of  
22 interest, they were excluded as well. Individuals were followed until December 31<sup>st</sup>  
23 2015, subsequent cancer diagnosis or date of death listed in the Registered Persons  
24 Database, whichever occurred first.  
25  
26  
27  
28  
29  
30  
31  
32  
33  
34  
35  
36  
37  
38  
39  
40  
41

#### 42 Outcome Definition

43  
44  
45 Our primary outcome for each individual was defined as the rate of ESAS  
46 assessments, calculated overall and annually. Patients were assigned to annual cohorts  
47 provided they had a clinic visit record in the Activity Level Reporting database during  
48 that year. This is aligned with Cancer Care Ontario's measure of symptom screening  
49 activity which is also person based. This database contains records of visits and  
50  
51  
52  
53  
54  
55  
56  
57  
58  
59  
60

1  
2  
3 services occurring at each cancer centre. It is mandatory for each centre to report their  
4 volumes of clinical service to Cancer Care Ontario via this database. As such in any  
5 specific year, all patients being analyzed were unique from each other. However, over  
6 multiple years (that is over multiple annual cohorts), patients are not necessarily unique  
7 from year to year. Individuals seen at a cancer centre in multiple years will be counted  
8 in each year that they have a visit. Within that year, if they have multiple ESAS's  
9 completed, they are only counted once. In any given year, the rate was calculated as  
10 the number of ESAS assessments divided by the total follow-up time in that year. This  
11 measurement approach adequately allows us to evaluate changes in the screening rate  
12 over time. For descriptive purposes, we also examined ESAS uptake as a binary  
13 outcome; if individuals had never undertaken an ESAS in that year, they were classified  
14 as non-ESAS users, otherwise they were classified as ESAS users. Dates for ESAS  
15 were determined from the ESAS database.

#### 32 33 34 Covariate definitions and data sources

35  
36  
37 Patient, tumor and system variables were chosen to adjust possible confounders  
38 when evaluating ESAS rate. Age was retrieved from Registered Persons Database  
39 which contains socio-demographic information of all Ontario Health Insurance Plan  
40 beneficiaries[23]. The type of cancer diagnosis was determined from the Ontario Cancer  
41 Registry [24-25]. Neighborhood income quintile at the start of each year was determined  
42 by linking postal codes and residential codes in the Registered Person Database to  
43 census data[26]. Region of residence was similarly determined. Cancer Care Ontario's  
44 public reporting has long identified variation by region ([www.csqi.on.ca](http://www.csqi.on.ca)). Since it would  
45 not be reasonable to place both LHIN and cancer centre into the model and since  
46  
47  
48  
49  
50  
51  
52  
53  
54  
55  
56  
57  
58  
59  
60

1  
2  
3 region can function as a surrogate for cancer centre, we elected to only incorporate  
4 region into the regression model. All CCO reporting is by region. Charlson score [27],  
5 was determined based on records from Canadian Institute of Health Information -  
6 Discharge Abstracts Database and Same Day Surgery Database. These datasets  
7 document diagnoses coded at hospital admissions [28]. The score was calculated with  
8 a 2 year look back window. Comorbidity was also assessed using Aggregated  
9 Diagnosis Groups based on a 2-year look back period, founded on the John's Hopkins  
10 Adjusted Clinical Group Systems [29]. Each patient could be assigned anywhere from 0  
11 to 32 Aggregated Diagnosis Groups. For this study, the number of Aggregated  
12 Diagnosis Groups was re-grouped into 3 categories:  $\geq 10$ , between 6 and 10, and  
13 between 0 to 5 [30]. Each individual's mean resource intensity weight was measured  
14 using the Resource Utilization Band based on a two-year look back window. For the  
15 purpose of our analyses, the Resource Utilization Band scores were analyzed similar to  
16 prior work [31]. Patients were assigned to one of six Resource Utilization Band  
17 categories; where 0 implied non-user and 5 was the highest level of resource use.  
18 Multiple variables for comorbidity and/or resource use were included in the model to  
19 adjust for possible confounding between illness level and the likelihood of having an  
20 ESAS (for example, sicker individuals might be more likely to visit the cancer centre and  
21 therefore complete an ESAS). This would facilitate a reasonable comparison among  
22 regions. An individual was identified as an immigrant if there was a "Date of Landing"  
23 record in the Immigration, Refugees and Citizenship Canada Permanent Resident  
24 Database ) [32]. This dataset is maintained by Citizenship and Immigration Canada. It  
25 provides demographic information for all legal immigrants to Canada including country  
26  
27  
28  
29  
30  
31  
32  
33  
34  
35  
36  
37  
38  
39  
40  
41  
42  
43  
44  
45  
46  
47  
48  
49  
50  
51  
52  
53  
54  
55  
56  
57  
58  
59  
60



1  
2  
3 of birth, citizenship, country of last permanent residence and date of immigration. We  
4  
5 further identify immigrants as either recent (<5 years since immigration) or long-term (≥5  
6  
7 years since immigration.  
8  
9

## 10 Statistical analyses

11  
12  
13  
14 We analyzed the overall cohort consisting of all unique individuals accrued over  
15  
16 the study period, and we subsequently analyzed each annual cohort of individuals. The  
17  
18 distributions of the baseline characteristics of the overall cohort, and distributions of the  
19  
20 baseline characteristics for each of the annual cohorts, were assessed. Counts and  
21  
22 proportions were used to describe categorical variables; mean, median and interquartile  
23  
24 range (IQR) were used to describe the continuous variables. As preliminary work, for each  
25  
26 year, histograms were developed to illustrate the distribution of the number of ESAS  
27  
28 assessments among those who had at least one ESAS in that year. In addition, the  
29  
30 proportion of patients who had at least 1 ESAS assessment in that year was overlaid on  
31  
32 the histogram as a horizontal line.  
33  
34  
35  
36  
37

38 Factors associated with the rate of ESAS uptake was first examined in our overall  
39  
40 cohort. As the number of ESAS assessments along with follow-up time varies significantly  
41  
42 across patients, a negative binomial regression model was implemented. The natural  
43  
44 logarithm of the follow-up time was used as an offset term in the model. A generalized  
45  
46 estimating equations (GEE) approach with an exchangeable correlation structure was  
47  
48 imposed to account for possible correlation that may arise due to annual repeated  
49  
50 measures on each individual (33). Characteristics included into the model were age, sex,  
51  
52 income quintile, immigration status, region of residence, cancer type, Charlson group,  
53  
54  
55  
56  
57  
58  
59  
60

1  
2  
3 Aggregated Diagnosis Group, and Resource Utilization Band group. Both univariable and  
4 multivariable regression models were implemented. Collinearity between the variables  
5  
6 was assessed using the variance inflation factor, where a cut-off of 5 or higher was used  
7  
8 as an indication of collinearity.  
9

10  
11  
12  
13 Factors associated with the rate of ESAS uptake was also examined on an  
14  
15 annual basis, which was done in order to describe if the associations were changing  
16  
17 over time. Since there were no repeated observations from the same individual within  
18  
19 any given year, we used a negative binomial regression model (without a GEE  
20  
21 approach), and conducted both univariable and multivariable analyses. All analyses  
22  
23 were completed using SAS version 9.3 and R statistical software version 3.2.3.  
24  
25

#### 26 27 28 Ethics Approval

29  
30  
31 The study was conducted in accordance with the strict privacy and confidentiality  
32  
33 policies of the Institute for Clinical Evaluative Sciences.  
34  
35

#### 36 37 **Results**

38  
39 We identified 525, 409 unique patients with at least one visit to a cancer centre between  
40  
41 2007 and 2015. 5908 individuals were excluded because of missing covariate  
42  
43 information (n=3235) or invalid visit type (n=2673). The group with missing information  
44  
45 constitutes about 1% of the cohort across all levels of covariates. This means that some  
46  
47 characteristics have far less than 1% missing, and thus cannot be described due to  
48  
49 small sample size reporting constraints. Also since there is no reason to suspect a  
50  
51 pattern for the missing information and since this small percentage will not influence our  
52  
53 final interpretations, we have not provided further descriptions of this group.  
54  
55  
56  
57  
58  
59  
60

1  
2  
3 Cohort characteristics are presented in Table 1.  
4  
5

6 The figure in the appendix demonstrates the uptake of ESAS in alternating years  
7 from 2007-2015 (for simplicity, not every year is shown). The proportion of patients  
8 with at least one ESAS increases from 5% in 2007 to 67% in 2015 (represented by the  
9 horizontal dotted line, right sided y-axis). This figure also demonstrates the distribution  
10 of the number of ESAS assessments among responders (left sided y-axis). Patients  
11 have 1-2 assessments per year most commonly.  
12  
13  
14  
15  
16  
17  
18  
19  
20

21 The negative binomial GEE model for examining factors associated with the rate  
22 of ESAS uptake, using the entire cohort (n=525,409), indicates the relative rates from  
23 both univariable and multivariable model were similar except for gender. The estimate  
24 from the univariable model showed that females had a 10% higher ESAS uptake rate  
25 compared with males. However after multivariable adjustment, the rate of ESAS uptake  
26 was 5% lower among females compared with males. With lung as the reference cancer  
27 type, all other cancer types were associated with lower ESAS use. With region 7 as the  
28 reference level, all other regions were associated with a higher ESAS use (Figure 1).  
29  
30  
31  
32  
33  
34  
35  
36  
37  
38  
39

40 Table 1A in the appendix describes the characteristics for the annual cohorts in  
41 2007, 2011 and 2015 (for simplicity, not every year is shown). The distribution of  
42 characteristics is similar from year to year with the exception of immigration status and  
43 Charlson score.  
44  
45  
46  
47  
48  
49

50 The forest plots shown in Figures 2 and 3 illustrate the results from the negative  
51 binomial multivariable regression model for years 2007, 2011 and 2015. Figure 2  
52 displays the forest plots for cancer type and comorbidity. In 2007, the relative rates of  
53  
54  
55  
56  
57  
58  
59  
60

1  
2  
3 ESAS uptake by cancer type were much less than 1 across all cancer types, using lung  
4 cancer as a reference, with a relative rate as low as 0.031 for prostate cancer. By 2015  
5  
6 this range had improved considerably, though prostate cancer still had the lowest  
7  
8 relative rate.  
9  
10

11  
12  
13 Figure 3 displays the forest plots for the remaining characteristics. Age had a  
14 consistent relative rate across the years. Gender did not have a significant effect in  
15  
16 2007 but was significant in 2011 and 2015. In 2007 there was no significant association  
17  
18 between income quintile on ESAS uptake. In 2015, individuals belonging to income  
19  
20 quintile 1 and 2 (poorer) were associated with decreased ESAS uptake comparison to  
21  
22 income quintile 5 (richer). ESAS uptake in long-term immigrants did not differ  
23  
24 significantly from non-immigrants in 2007 but was demonstrated to have lower relative  
25  
26 rates in 2011 and 2015. On the other hand, recent immigrants were found to have a  
27  
28 34% decrease in ESAS counts in 2007, but do not differ significantly in 2011 and 2015  
29  
30 compared to non-immigrants. For relative rates of ESAS by region, we observed that  
31  
32 largest variation was in 2007, where the range in relative rates was from 0.31 (95% CI  
33  
34 0.26-0.38) to 13.3 (95% CI 11.65-15.20). By 2015, the range had diminished, from 0.7  
35  
36 (95% CI 0.67-0.73) to 1.56 (95% CI 1.51-1.61).  
37  
38  
39  
40  
41  
42  
43

#### 44 **Interpretation**

45  
46  
47 We have demonstrated that ESAS uptake in Ontario cancer centres has  
48 increased considerably over time. This a strong demonstration of the ability to  
49  
50 implement a patient reported outcome program on a large scale. The amount of  
51  
52 variation seen in association with certain variables has improved. For example, there is  
53  
54  
55  
56  
57  
58  
59  
60

1  
2  
3 much less variation by region and cancer type now, compared to earlier years. Those  
4  
5 with comorbid illnesses are more likely to be screened which mitigates concerns that  
6  
7 more complicated patients are being missed. However, there is still variation by other  
8  
9 variables raising the possibility of ongoing equity issues.  
10  
11  
12

13 CCO's role as a provincial cancer agency is a key factor in this programmatic  
14  
15 uptake. Including patient reported outcomes in the provincial cancer plan makes it a  
16  
17 clear strategic priority. Dedicated funding to local centres to support ongoing  
18  
19 implementation and execution of the program facilitates this priority. Cancer Care  
20  
21 Ontario monitors several performance measures for each regional program including  
22  
23 the ESAS screening rate. This is evaluated with senior leadership on a quarterly basis  
24  
25 [22, 34]. This performance management system may also have contributed to  
26  
27 decreasing variation across regions. Other ongoing quality improvement activities such  
28  
29 as annual chart reviews to assess symptom management and patient surveys of their  
30  
31 experience with ESAS has likely also contributed to sustaining symptom screening  
32  
33 activity.  
34  
35  
36  
37  
38

39 The implementation has reached all tumor sites, having started primarily in lung.  
40  
41 Prostate cancer remains the cancer site screened least often. It has been reported by  
42  
43 clinicians that the ESAS items are not always relevant to their patient population[35]. In  
44  
45 2016, Cancer Care Ontario began province wide implementation of the Expanded  
46  
47 Prostate Cancer Index-Clinical Practice (EPIC-CP)[36, 37]. This measure has urinary,  
48  
49 bowel and sexual function domains which are highly relevant to prostate cancer  
50  
51 patients.  
52  
53  
54  
55  
56  
57  
58  
59  
60

1  
2  
3 The uptake of symptom screening by sex, income and immigration status has  
4 changed over time, in some cases improving and in others, worsening. It may be that  
5 deprived individuals stand to benefit the most from standardized symptom screening.  
6 For example, in Basch *et al's* study those who were computer inexperienced benefited  
7 the most from the intervention [10]. Equity issues will need to be a focus of ongoing  
8 quality improvement efforts locally and programmatic changes provincially.  
9

10  
11  
12  
13  
14  
15  
16  
17  
18 Strengths of this paper are that we included patients attending regional cancer  
19 centres in the denominator which ensures that they all were eligible to complete ESAS.  
20 The data for this population is extensive and population based. The use of ESAS  
21 uptake rate as an outcome accommodates for varying amount of follow up time for each  
22 individual patient. The factors evaluated included patient, tumor and system factors.  
23  
24  
25  
26  
27  
28

### 29 30 Limitations

31  
32  
33 Limitations of the study include that more granular details beyond immigration  
34 status (such as fluency in English) were not available. Although we are able to observe  
35 how frequently ESAS was completed, we are not able to draw conclusions about how  
36 the data was actually used in care. The results may not be generalizable to other  
37 jurisdictions. The ALR dataset has not been validated although reporting is mandatory.  
38 The CIC dataset has also not been validated. An alternative approach to measuring the  
39 outcome might have been a visit based indicator. However, given that all covariates are  
40 patient based not visit based, this alternative outcome definition is unlikely to change  
41 our conclusions. Furthermore, our measurement approach is more closely aligned with  
42  
43  
44  
45  
46  
47  
48  
49  
50  
51  
52  
53  
54  
55  
56  
57  
58  
59  
60

1  
2  
3 Cancer Care Ontario's measurement approach, making our observations more directly  
4  
5 applicable to the program.  
6  
7

## 8 Conclusions 9

10  
11 Patient reported outcomes are becoming a more common feature of routine  
12 clinical care. The cancer system in Ontario has implemented symptom screening  
13  
14 across the system. Cancer specific measures, such as the prostate measure, will  
15  
16 hopefully further improve clinician and patient engagement with the program.  
17  
18 Opportunities to improve the uptake overall and to decrease variation by equity  
19  
20 variables remains.  
21  
22  
23  
24  
25  
26  
27  
28  
29  
30  
31  
32  
33  
34  
35  
36  
37  
38  
39  
40  
41  
42  
43  
44  
45  
46  
47  
48  
49  
50  
51  
52  
53  
54  
55  
56  
57  
58  
59  
60

## Reference List

- 1 US Food and Drug Administration. Guidance for industry. Patient-reported outcomes measures: use in medical product development to support labeling claims. 74[35], 65132-65133. 2009. Federal Register.
- 2 Acquadro C, Berzon R, Dubois D, Leidy NK, Marquis P, Revicki D *et al.* Incorporating the patient's perspective into drug development and communication: an ad hoc task force report of the Patient-Reported Outcomes (PRO) Harmonization Group meeting at the Food and Drug Administration, February 16, 2001. *Value Health* 2003;6:522-31.
- 3 Au HJ, Ringash J, Brundage M, Palmer M, Richardson H, Meyer RM. Added value of health-related quality of life measurement in cancer clinical trials: the experience of the NCIC CTG. *Expert Rev Pharmacoecon Outcomes Res* 2010;10:119-28.
- 4 Snyder CF, Aaronson NK. Use of patient-reported outcomes in clinical practice. *Lancet* 2009;374:369-70.
- 5 Greenhalgh J, Meadows K. The effectiveness of the use of patient-based measures of health in routine practice in improving the process and outcomes of patient care: a literature review. *J Eval Clin Pract* 1999;5:401-16.
- 6 Kotronoulas G, Kearney N, Maguire R, Harrow A, Di Domenico D, Croy S *et al.* What is the value of the routine use of patient-reported outcome measures toward improvement of patient outcomes, processes of care, and health service outcomes in cancer care? A systematic review of controlled trials. *J Clin Oncol* 2014;32:1480-501.
- 7 Chen J, Ou L, Hollis SJ. A systematic review of the impact of routine collection of patient reported outcome measures on patients, providers and health organisations in an oncologic setting. *BMC Health Serv Res* 2013;13:211.
- 8 Yang LY, Manhas DS, Howard AF, Olson RA. Patient-reported outcome use in oncology: a systematic review of the impact on patient-clinician communication. *Support Care Cancer* 2018;26:41-60.
- 9 Howell D, Liu G. Can routine collection of patient reported outcome data actually improve person-centered health? *Healthc Pap* 2011;11:42-7.
- 10 Basch E, Deal AM, Kris MG, Scher HI, Hudis CA, Sabbatini P *et al.* Symptom Monitoring With Patient-Reported Outcomes During Routine Cancer Treatment: A Randomized Controlled Trial. *J Clin Oncol* 2016;34:557-65.
- 11 Basch E, Deal AM, Dueck AC, Scher HI, Kris MG, Hudis C *et al.* Overall Survival Results of a Trial Assessing Patient-Reported Outcomes for Symptom Monitoring During Routine Cancer Treatment. *JAMA* 2017;318:197-8.



- 12 Denis F, Lethrosne C, Pourel N, Molinier O, Pointreau Y, Domont J *et al.* Randomized Trial Comparing a Web-Mediated Follow-up With Routine Surveillance in Lung Cancer Patients. *J Natl Cancer Inst* 2017;109.
- 13 Barbera L, Sutradhar R, Howell D, Sussman J, Seow H, Dudgeon D *et al.* Does routine symptom screening with ESAS decrease ED visits in breast cancer patients undergoing adjuvant chemotherapy? *Support Care Cancer* 2015;23:3025-32.
- 14 Schepers SA, Sint Nicolaas SM, Haverman L, Wensign M, Schouten van Meeteren AYN, Veening MA *et al.* Real-world implementation of electronic patient-reported outcomes in outpatient pediatric cancer care. *Psychooncol* 2017;26:951-959.
- 15 Basch E, Barbera L, Kerrigan CL, Velikova G. Implementation of Patient-Reported Outcomes in Routine Medical Care. *Am Soc Clin Oncol Educ Book* 2018; 38:122-134.
- 16 National Health Service. Digital Patient Reported Outcomes. <https://digital.nhs.uk/data-and-information/data-tools-and-services/data-services/patient-reported-outcome-measures-proms>. Accessed Sept 15, 2018.
- 17 Nilsson E, Orwelius L, Kristenson M. Patient-reported outcomes in the Swedish National Quality Registers. *J Intern Med* 2016; 279:141-153.
- 18 Bruera E, Kuehn N, Miller MJ, Selmser P, Macmillan K. The Edmonton Symptom Assessment System (ESAS): a simple method for the assessment of palliative care patients. *J Palliat Care* 1991;7:6-9.
- 19 Chang VT, Hwang SS, Feuerman M. Validation of the Edmonton Symptom Assessment Scale. *Cancer* 2000;88:2164-71.
- 20 Dudgeon D, King S, Howell D, Green E, Gilbert J, Hughes E *et al.* Cancer Care Ontario's experience with implementation of routine physical and psychological symptom distress screening. *Psychooncology* 2012;21:357-64.
- 21 Gilbert JE, Howell D, King S, Sawka C, Hughes E, Angus H *et al.* Quality improvement in cancer symptom assessment and control: the Provincial Palliative Care Integration Project (PPCIP). *J Pain Symptom Manage* 2012;43:663-78.
- 22 Pereira J, Green E, Molloy S, Dudgeon D, Howell D, Krzyzanowska MK *et al.* Population-based standardized symptom screening: Cancer Care Ontario's Edmonton Symptom Assessment System and performance status initiatives. *J Oncol Pract* 2014;10:212-4.
- 23 Iron K, Zagorski BM, Sykora K, Manuel DG. Living and dying in Ontario: An opportunity for improved health information. ICES Investigative Report. 2008. Toronto, Institute for Clinical Evaluative Sciences.
- 24 Robles SC, Marrett LD, Clarke EA, Risch HA. An application of capture-recapture methods to the estimation of completeness of cancer registration. *J Clin Epidemiol* 1988;41:495-501.

- 1  
2  
3 25 Clarke EA, Marrett LD, Kreiger N. Cancer registration in Ontario: A computer approach. In Jensen  
4 OM, Parkin DM, MacLennan R, Muir CS, Skeet RG, eds. *Cancer registration principles and*  
5 *methods*. Lyon, France: IARC Pub, 1991; p. 246-57.  
6  
7 26 Wilkins R. PCCF + Version 3G Users Guide: Automated Geographic Coding Based on the Statistics  
8 Canada Postal Code Conversions Files. 2001. Ottawa, Statistics Canada.  
9  
10  
11 27 Deyo RA, Cherkin DC, Ciol MA. Adapting a clinical comorbidity index for use with ICD-9-CM  
12 administrative databases. *J Clin Epidemiol* 1992;45:613-9.  
13  
14 28 Canadian Institute for Health Information. Data quality of the discharge abstract database  
15 following the first year implementation of ICD-10-CA/CCI-Final Report. 2004. Ottawa, CIHI  
16  
17 29 Jonathan P. Weiner. The Johns Hopkins ACG Case-Mix System Version 6.0 Release Notes (Systems  
18 Documentation). ), editor. 2003. Baltimore, The Johns Hopkins University Bloomberg School of  
19 Public Health.  
20  
21  
22 30 Sibley LM, Moineddin R, Agha MM, Glazier RH. Risk Adjustment Using Administrative Data-Based  
23 and Survey-Derived Methods for Explaining Physician Utilization. *Med Care* 2010;48.  
24  
25 31 Mittmann N, Liu N, Porter J, Seung SJ, Hon, Isogai PK *et al.* Utilization and costs of home care for  
26 patients with ácolorectal cancer: a population-based study. *CMAJ Open* 2014;2:E11-E17.  
27  
28 32. Chiu M, Lebenbaum M, Lam K, Chong N, Azimae M, Iron K, Manuel D *et al.* Describing the  
29 linkages of the Immigration, Refugees and Citizenship Canada permanent resident data and vial  
30 statistics death registry to Ontario's administrative health database. *BMC Med Inform Decis Mak*  
31 2016; 16:135  
32  
33 33. Liang K, Zeger SL. Longitudinal data analysis using generalized linear models. *Biometrika* 1986; 73:  
34 13-22.  
35  
36  
37 34. Evans WK, Truscott R, Cameron E, Peter A, Reid R, Selby P, *et al.* Lessons learned implementing a  
38 province-wide smoking cessation initiative in Ontario's cancer centres. *Current Oncol* 2017; 24:  
39 e185-e190.  
40  
41 35 Pereira JL, Chasen MR, Molloy S, Amernic H, Brundage MD, Green E *et al.* Cancer Care  
42 Professionals' Attitudes Toward Systematic Standardized Symptom Assessment and the Edmonton  
43 Symptom Assessment System After Large-Scale Population-Based Implementation in Ontario,  
44 Canada. *J Pain Symptom Manage* 2016;51:662-72.  
45  
46 36 Korzeniowski M, Kalyvas M, Mahmud A, Shenfield C, Tong C, Zaza K *et al.* Piloting prostate cancer  
47 patient-reported outcomes in clinical practice. *Support Care Cancer* 2016;24:1983-90.  
48  
49 37 Brundage, M.D., Barbera, L., McCallum, F. et al. A pilot evaluation of the expanded prostate  
50 cancer index composite for clinical practice (EPIC\_CP) tool in Ontario. *Qual Life Res*; 2018;  
51 <https://doi.org/10.1007/s11136-018-2034-x>  
52  
53  
54  
55  
56  
57  
58  
59  
60

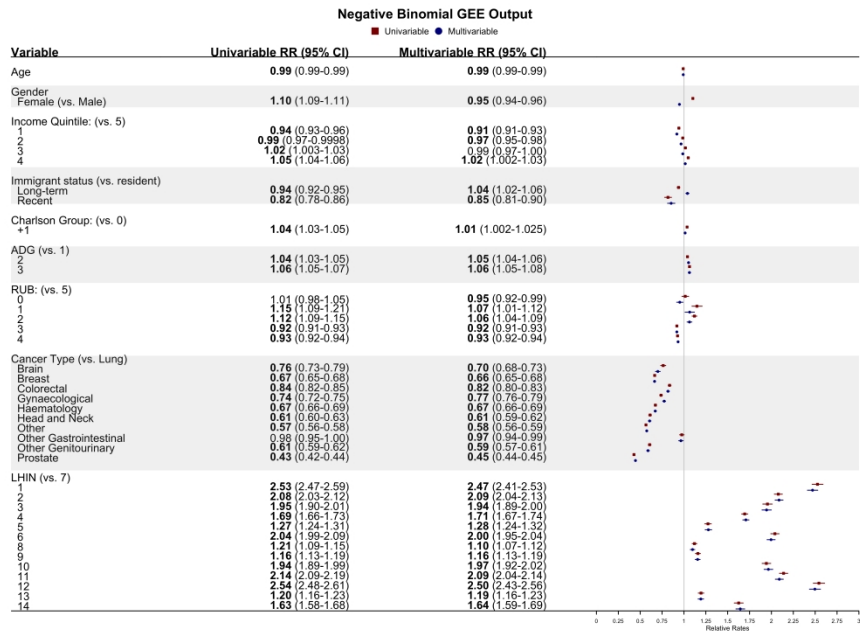

Negative Binomial GEE Output

2540x1693mm (72 x 72 DPI)

1  
2  
3  
4  
5  
6  
7  
8  
9  
10  
11  
12  
13  
14  
15  
16  
17  
18  
19  
20  
21  
22  
23  
24  
25  
26  
27  
28  
29  
30  
31  
32  
33  
34  
35  
36  
37  
38  
39  
40  
41  
42  
43  
44  
45  
46  
47  
48  
49  
50  
51  
52  
53  
54  
55  
56  
57  
58  
59  
60

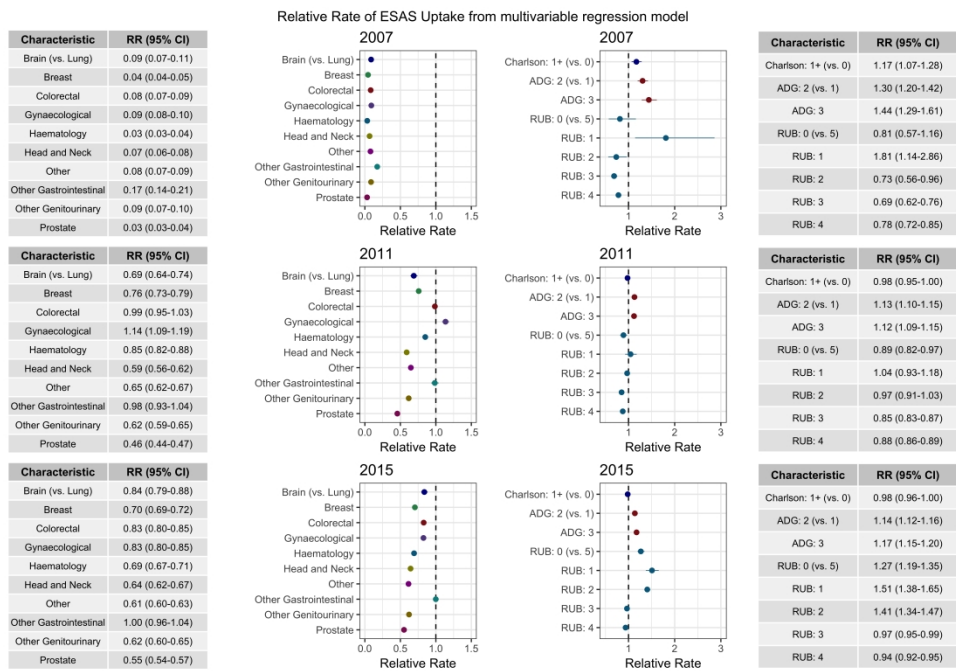

Relative rate of ESAS uptake from multi variable regression model

2540x1693mm (72 x 72 DPI)

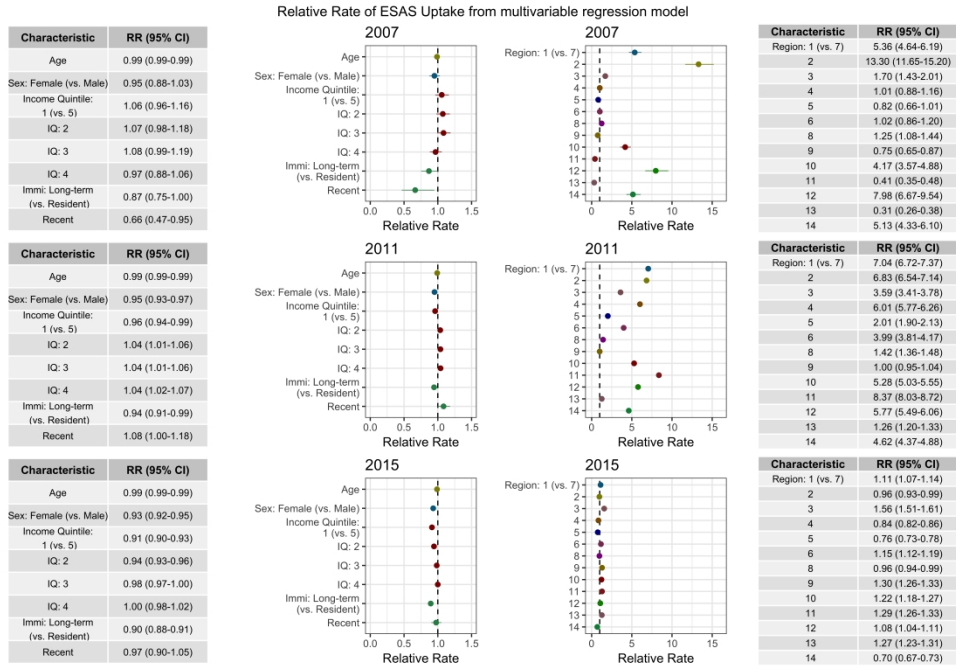

Relative rate of ESAS uptake from multi variable regression model

2540x1693mm (72 x 72 DPI)

Table 1: Cohort characteristics at baseline

| Characteristic                      | Level                  | N                     | Proportion |
|-------------------------------------|------------------------|-----------------------|------------|
| <b>Overall</b>                      |                        | 525409                | 1.00       |
| <b>Age (mean)<br/>(median, IQR)</b> |                        | 64.37<br>65 (56 – 75) |            |
| <b>Sex</b>                          | Female                 | 274476                | 0.52       |
|                                     | Male                   | 250993                | 0.48       |
| <b>Income Quintile</b>              | 1                      | 93866                 | 0.18       |
|                                     | 2                      | 103577                | 0.20       |
|                                     | 3                      | 103228                | 0.20       |
|                                     | 4                      | 109642                | 0.21       |
|                                     | 5 (Wealthiest)         | 115096                | 0.22       |
| <b>Immigrant Status</b>             | Long-term              | 37114                 | 0.07       |
|                                     | Recent                 | 6104                  | 0.01       |
|                                     | Resident               | 482191                | 0.92       |
| <b>Type of Cancer</b>               | Brain                  | 8119                  | 0.02       |
|                                     | Breast                 | 111543                | 0.21       |
|                                     | Colorectal             | 54871                 | 0.10       |
|                                     | Gynaecological         | 35022                 | 0.07       |
|                                     | Haematology            | 52609                 | 0.10       |
|                                     | Head and Neck          | 20277                 | 0.04       |
|                                     | Lung                   | 50541                 | 0.10       |
|                                     | Other                  | 67268                 | 0.13       |
|                                     | Other Gastrointestinal | 21048                 | 0.04       |
|                                     | Other Genitourinary    | 24552                 | 0.05       |
|                                     | Prostate               | 79559                 | 0.15       |
| <b>Region</b>                       | 1                      | 30053                 | 0.06       |
|                                     | 2                      | 40377                 | 0.08       |
|                                     | 3                      | 24625                 | 0.05       |
|                                     | 4                      | 64800                 | 0.12       |
|                                     | 5                      | 21872                 | 0.04       |
|                                     | 6                      | 36791                 | 0.07       |
|                                     | 7                      | 44241                 | 0.08       |
|                                     | 8                      | 59952                 | 0.11       |
|                                     | 9                      | 60268                 | 0.11       |
|                                     | 10                     | 25102                 | 0.05       |
|                                     | 11                     | 53126                 | 0.10       |
|                                     | 12                     | 21124                 | 0.04       |
|                                     | 13                     | 30542                 | 0.06       |
|                                     | 14                     | 12536                 | 0.02       |

|                       |        |        |      |
|-----------------------|--------|--------|------|
| <b>Charlson Score</b> | 0      | 462189 | 0.88 |
|                       | 1+     | 63220  | 0.12 |
| <b>ADG Score</b>      | 1 – 5  | 188057 | 0.36 |
|                       | 6 – 10 | 235163 | 0.45 |
|                       | 10+    | 102189 | 0.19 |
| <b>RUB Score</b>      | 0      | 14701  | 0.03 |
|                       | 1      | 6380   | 0.01 |
|                       | 2      | 27597  | 0.05 |
|                       | 3      | 219284 | 0.42 |
|                       | 4      | 135096 | 0.26 |
|                       | 5      | 122351 | 0.23 |

ADG: Aggregated diagnosis groups

RUB: Resource utilization band

Confidential

## STROBE Statement—checklist of items that should be included in reports of observational studies

|                              | Item No | Recommendation                                                                                                                                                                                                                                                                                                                                                                                                                                                                                                                                                                                                                                                                                   |
|------------------------------|---------|--------------------------------------------------------------------------------------------------------------------------------------------------------------------------------------------------------------------------------------------------------------------------------------------------------------------------------------------------------------------------------------------------------------------------------------------------------------------------------------------------------------------------------------------------------------------------------------------------------------------------------------------------------------------------------------------------|
| <b>Title and abstract</b>    | 1       | (a) Indicate the study's design with a commonly used term in the title or the abstract<br>(b) Provide in the abstract an informative and balanced summary of what was done and what was found                                                                                                                                                                                                                                                                                                                                                                                                                                                                                                    |
| <b>Introduction</b>          |         |                                                                                                                                                                                                                                                                                                                                                                                                                                                                                                                                                                                                                                                                                                  |
| Background/rationale         | 2       | Explain the scientific background and rationale for the investigation being reported                                                                                                                                                                                                                                                                                                                                                                                                                                                                                                                                                                                                             |
| Objectives                   | 3       | State specific objectives, including any prespecified hypotheses                                                                                                                                                                                                                                                                                                                                                                                                                                                                                                                                                                                                                                 |
| <b>Methods</b>               |         |                                                                                                                                                                                                                                                                                                                                                                                                                                                                                                                                                                                                                                                                                                  |
| Study design                 | 4       | Present key elements of study design early in the paper                                                                                                                                                                                                                                                                                                                                                                                                                                                                                                                                                                                                                                          |
| Setting                      | 5       | Describe the setting, locations, and relevant dates, including periods of recruitment, exposure, follow-up, and data collection                                                                                                                                                                                                                                                                                                                                                                                                                                                                                                                                                                  |
| Participants                 | 6       | (a) <i>Cohort study</i> —Give the eligibility criteria, and the sources and methods of selection of participants. Describe methods of follow-up<br><i>Case-control study</i> —Give the eligibility criteria, and the sources and methods of case ascertainment and control selection. Give the rationale for the choice of cases and controls<br><i>Cross-sectional study</i> —Give the eligibility criteria, and the sources and methods of selection of participants<br>(b) <i>Cohort study</i> —For matched studies, give matching criteria and number of exposed and unexposed<br><i>Case-control study</i> —For matched studies, give matching criteria and the number of controls per case |
| Variables                    | 7       | Clearly define all outcomes, exposures, predictors, potential confounders, and effect modifiers. Give diagnostic criteria, if applicable                                                                                                                                                                                                                                                                                                                                                                                                                                                                                                                                                         |
| Data sources/<br>measurement | 8*      | For each variable of interest, give sources of data and details of methods of assessment (measurement). Describe comparability of assessment methods if there is more than one group                                                                                                                                                                                                                                                                                                                                                                                                                                                                                                             |
| Bias                         | 9       | Describe any efforts to address potential sources of bias                                                                                                                                                                                                                                                                                                                                                                                                                                                                                                                                                                                                                                        |
| Study size                   | 10      | Explain how the study size was arrived at                                                                                                                                                                                                                                                                                                                                                                                                                                                                                                                                                                                                                                                        |
| Quantitative variables       | 11      | Explain how quantitative variables were handled in the analyses. If applicable, describe which groupings were chosen and why                                                                                                                                                                                                                                                                                                                                                                                                                                                                                                                                                                     |
| Statistical methods          | 12      | (a) Describe all statistical methods, including those used to control for confounding<br>(b) Describe any methods used to examine subgroups and interactions<br>(c) Explain how missing data were addressed<br>(d) <i>Cohort study</i> —If applicable, explain how loss to follow-up was addressed<br><i>Case-control study</i> —If applicable, explain how matching of cases and controls was addressed<br><i>Cross-sectional study</i> —If applicable, describe analytical methods taking account of sampling strategy<br>(e) Describe any sensitivity analyses                                                                                                                                |

Continued on next page



**Results**

|                  |     |                                                                                                                                                                                                                                                                                                                                                                                                               |
|------------------|-----|---------------------------------------------------------------------------------------------------------------------------------------------------------------------------------------------------------------------------------------------------------------------------------------------------------------------------------------------------------------------------------------------------------------|
| Participants     | 13* | (a) Report numbers of individuals at each stage of study—eg numbers potentially eligible, examined for eligibility, confirmed eligible, included in the study, completing follow-up, and analysed<br>(b) Give reasons for non-participation at each stage<br>(c) Consider use of a flow diagram                                                                                                               |
| Descriptive data | 14* | (a) Give characteristics of study participants (eg demographic, clinical, social) and information on exposures and potential confounders<br>(b) Indicate number of participants with missing data for each variable of interest<br>(c) <i>Cohort study</i> —Summarise follow-up time (eg, average and total amount)                                                                                           |
| Outcome data     | 15* | <i>Cohort study</i> —Report numbers of outcome events or summary measures over time<br><i>Case-control study</i> —Report numbers in each exposure category, or summary measures of exposure<br><i>Cross-sectional study</i> —Report numbers of outcome events or summary measures                                                                                                                             |
| Main results     | 16  | (a) Give unadjusted estimates and, if applicable, confounder-adjusted estimates and their precision (eg, 95% confidence interval). Make clear which confounders were adjusted for and why they were included<br>(b) Report category boundaries when continuous variables were categorized<br>(c) If relevant, consider translating estimates of relative risk into absolute risk for a meaningful time period |
| Other analyses   | 17  | Report other analyses done—eg analyses of subgroups and interactions, and sensitivity analyses                                                                                                                                                                                                                                                                                                                |

**Discussion**

|                  |    |                                                                                                                                                                            |
|------------------|----|----------------------------------------------------------------------------------------------------------------------------------------------------------------------------|
| Key results      | 18 | Summarise key results with reference to study objectives                                                                                                                   |
| Limitations      | 19 | Discuss limitations of the study, taking into account sources of potential bias or imprecision. Discuss both direction and magnitude of any potential bias                 |
| Interpretation   | 20 | Give a cautious overall interpretation of results considering objectives, limitations, multiplicity of analyses, results from similar studies, and other relevant evidence |
| Generalisability | 21 | Discuss the generalisability (external validity) of the study results                                                                                                      |

**Other information**

|         |    |                                                                                                                                                               |
|---------|----|---------------------------------------------------------------------------------------------------------------------------------------------------------------|
| Funding | 22 | Give the source of funding and the role of the funders for the present study and, if applicable, for the original study on which the present article is based |
|---------|----|---------------------------------------------------------------------------------------------------------------------------------------------------------------|

\*Give information separately for cases and controls in case-control studies and, if applicable, for exposed and unexposed groups in cohort and cross-sectional studies.

**Note:** An Explanation and Elaboration article discusses each checklist item and gives methodological background and published examples of transparent reporting. The STROBE checklist is best used in conjunction with this article (freely available on the Web sites of PLoS Medicine at <http://www.plosmedicine.org/>, Annals of Internal Medicine at <http://www.annals.org/>, and Epidemiology at <http://www.epidem.com/>). Information on the STROBE Initiative is available at [www.strobe-statement.org](http://www.strobe-statement.org).

1  
2  
3  
4  
5  
6  
7  
8  
9  
10  
11  
12  
13  
14  
15  
16  
17  
18  
19  
20  
21  
22  
23  
24  
25  
26  
27  
28  
29  
30  
31  
32  
33  
34  
35  
36  
37  
38  
39  
40  
41

Figure 1A. Distribution of ESAS counts among ESASers

The bars represent the number of patients with a particular number of ESAS assessment in a given year, using the y-axis to the left. The horizontal line represents the proportion of individuals who have at least 1 ESAS in that year, using the y-axis to the right.

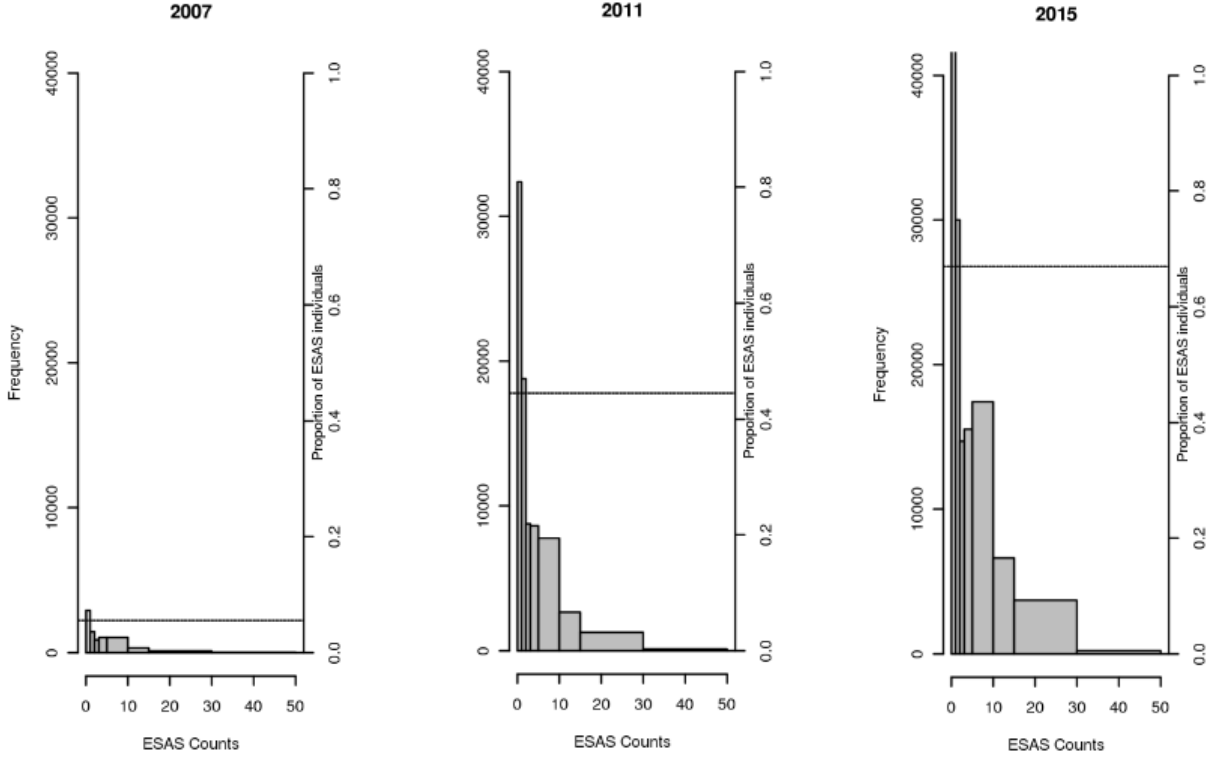

Appendix:

Table 1A: Cohort characteristics by year.

| Year | Characteristic          | 2007                   |              | 2011       |              | 2015       |              |            |
|------|-------------------------|------------------------|--------------|------------|--------------|------------|--------------|------------|
|      |                         | Level                  | N            | Proportion | N            | Proportion | N            | Proportion |
|      | <b>Overall</b>          |                        | 139977       |            | 180869       |            | 213705       |            |
|      | Age (mean)              |                        | 64.02        |            | 64.52        |            | 65.20        |            |
|      | Median (IQR)            |                        | 65 (55 – 74) |            | 66 (56 – 75) |            | 66 (57 – 75) |            |
|      | <b>Sex</b>              | Female                 | 73916        | 0.53       | 94681        | 0.52       | 113895       | 0.53       |
|      |                         | Male                   | 66061        | 0.47       | 86188        | 0.48       | 99810        | 0.47       |
|      | <b>Income Quintile</b>  | 1                      | 24177        | 0.17       | 30006        | 0.17       | 35827        | 0.17       |
|      |                         | 2                      | 27164        | 0.19       | 34579        | 0.19       | 40644        | 0.19       |
|      |                         | 3                      | 27242        | 0.19       | 35321        | 0.20       | 42154        | 0.20       |
|      |                         | 4                      | 28882        | 0.21       | 38671        | 0.21       | 46077        | 0.22       |
|      |                         | 5 (Wealthiest)         | 32512        | 0.23       | 42292        | 0.23       | 49003        | 0.23       |
|      | <b>Immigrant Status</b> | Long-term              | 7247         | 0.05       | 12422        | 0.07       | 20353        | 0.10       |
|      |                         | Recent                 | 1195         | 0.01       | 1622         | 0.01       | 1273         | 0.01       |
|      |                         | Resident               | 131535       | 0.94       | 166825       | 0.92       | 192079       | 0.90       |
|      | <b>Type of Cancer</b>   | Brain                  | 1978         | 0.01       | 2528         | 0.01       | 2848         | 0.01       |
|      |                         | Breast                 | 35907        | 0.26       | 44569        | 0.25       | 51062        | 0.24       |
|      |                         | Colorectal             | 12562        | 0.09       | 16599        | 0.09       | 19927        | 0.09       |
|      |                         | Gynaecological         | 9313         | 0.07       | 11656        | 0.06       | 13292        | 0.06       |
|      |                         | Haematology            | 15501        | 0.11       | 20192        | 0.11       | 26534        | 0.12       |
|      |                         | Head and Neck          | 6253         | 0.04       | 7409         | 0.04       | 8438         | 0.04       |
|      |                         | Lung                   | 8060         | 0.06       | 10927        | 0.06       | 13813        | 0.06       |
|      |                         | Other                  | 14581        | 0.10       | 20442        | 0.11       | 27418        | 0.13       |
|      |                         | Other Gastrointestinal | 3013         | 0.02       | 4521         | 0.02       | 6012         | 0.03       |

1  
2  
3  
4  
5  
6  
7  
8  
9  
10  
11  
12  
13  
14  
15  
16  
17  
18  
19  
20  
21  
22  
23  
24  
25  
26  
27  
28  
29  
30  
31  
32  
33  
34  
35  
36  
37  
38  
39  
40  
41  
42  
43  
44  
45  
46  
47

|                       |                     |        |      |        |      |        |      |
|-----------------------|---------------------|--------|------|--------|------|--------|------|
|                       | Other Genitourinary | 5354   | 0.04 | 7275   | 0.04 | 8914   | 0.04 |
|                       | Prostate            | 27455  | 0.20 | 34751  | 0.19 | 35447  | 0.17 |
| <b>Region</b>         | 1                   | 8654   | 0.06 | 10025  | 0.06 | 9880   | 0.05 |
|                       | 2                   | 11433  | 0.08 | 12965  | 0.07 | 14020  | 0.07 |
|                       | 3                   | 6105   | 0.04 | 7663   | 0.04 | 9458   | 0.04 |
|                       | 4                   | 19208  | 0.14 | 23199  | 0.13 | 24567  | 0.11 |
|                       | 5                   | 4368   | 0.03 | 6187   | 0.03 | 10791  | 0.05 |
|                       | 6                   | 8483   | 0.06 | 12224  | 0.07 | 15993  | 0.07 |
|                       | 7                   | 12453  | 0.09 | 15456  | 0.09 | 19600  | 0.09 |
|                       | 8                   | 14674  | 0.10 | 21037  | 0.12 | 26886  | 0.13 |
|                       | 9                   | 15182  | 0.11 | 21437  | 0.12 | 25975  | 0.12 |
|                       | 10                  | 6577   | 0.05 | 8260   | 0.05 | 9417   | 0.04 |
|                       | 11                  | 15752  | 0.11 | 18963  | 0.10 | 20239  | 0.09 |
|                       | 12                  | 3563   | 0.03 | 7584   | 0.04 | 9371   | 0.04 |
|                       | 13                  | 9064   | 0.06 | 10706  | 0.06 | 12211  | 0.06 |
|                       | 14                  | 4461   | 0.03 | 5163   | 0.03 | 5297   | 0.02 |
| <b>Charlson Score</b> | 0                   | 123545 | 0.88 | 156043 | 0.86 | 181670 | 0.85 |
|                       | 1+                  | 16432  | 0.12 | 24826  | 0.14 | 32035  | 0.15 |
| <b>ADG</b>            | 1 – 5               | 38581  | 0.28 | 52790  | 0.29 | 63984  | 0.30 |
|                       | 6 – 10              | 67965  | 0.49 | 86089  | 0.48 | 98061  | 0.46 |
|                       | 10+                 | 33431  | 0.24 | 41990  | 0.23 | 51660  | 0.24 |
| <b>RUB Score</b>      | 0                   | 1011   | 0.01 | 1713   | 0.01 | 2085   | 0.01 |
|                       | 1                   | 447    | 0.00 | 757    | 0.00 | 807    | 0.00 |
|                       | 2                   | 1940   | 0.01 | 3293   | 0.02 | 4003   | 0.02 |
|                       | 3                   | 45437  | 0.32 | 60663  | 0.34 | 69393  | 0.32 |
|                       | 4                   | 45042  | 0.32 | 56119  | 0.31 | 64884  | 0.30 |
|                       | 5                   | 46100  | 0.33 | 58324  | 0.32 | 72533  | 0.34 |

ADG: Aggregated diagnosis groups  
RUB: Resource utilization band
